# Supplementary material for: Foraminifera assemblages in Pulau Redang: Uncovering Discrepancies and the Importance of FoRAM Index Calibration for Precise Reef Monitoring
Source: Research Square preprint supplement (doi:10.21203/rs.3.rs-3784490/v1), 2024-01-01
Supplement: Supplementary file 1 [file ad5257d730ecdddface04213.docx]

**Supplementary material**

Supplementary material 1. The classification of functional groups to benthic foraminifera identified from the coral reef area around Pulau Redang.

| Functional Group | Order | Family | Genus | Distribution |
| --- | --- | --- | --- | --- |
| Symbiont-bearing | Rotaliida | Amphisteginidae | *Amphistegina* | Circumtropical |
| Calcarinidae | 5 genera | Indo-Pacific |
| Nummulitidae | *Heterostegina* | Circumtropical |
| 3 other genera | Indo-Pacific |
| Miliolida | Miliolida | *Alveolinella* | Indo-Pacific |
| *Borelis* | Circumtropical |
| Peneroplidae | several genera | Circumtropical |
| Soritidae | Sorites | Circumtropical |
| *Amphisorus* | Circumtropical |
| 3 genera | Caribbean |
| *Marginopora* | Indo-Pacific |
| Opportunistic* | Trochamminida | Trochamminidae | Several genera | Cosmopolitan |
| Textulariida | Lituolidae | Several genera | Cosmopolitan |
| Buliminida | Bolivinidae | Several genera | Cosmopolitan |
| Buliminidae | Several genera | Cosmopolitan |
| Rotaliida | Rotaliidae | *Ammonia* | Cosmopolitan |
| Elphidiidae | *Elphidium* | Cosmopolitan |
| Other Small Taxa | Miliolida | Most except larger taxa noted above | | Cosmopolitan |
| Rotaliida | Most except those noted above | | Cosmopolitan |
| Textulariida | Most | | Cosmopolitan |
| Other | Most | | Cosmopolitan |
